# Supplementary material
Source: PubMed Central journal article supplement (PMC10518890)
Supplement: NIHMS1923192-supplement-Supplementary_Material.pdf [file NIHMS1923192-supplement-Supplementary_Material.pdf]

# Supplementary Material

## Site-specific synthesis of oligonucleotides containing 6-oxo-M<sub>1</sub>dG, the genomic metabolite of M<sub>1</sub>dG, and LC-MS/MS analysis of its *in vitro* bypass by human polymerase $\alpha$

Plamen P. Christov<sup>\*†</sup>, Robyn Richie-Jannetta<sup>\*‡</sup>, Philip J. Kingsley<sup>\*‡</sup>, Anoop Vemulapalli<sup>‡</sup>, Kwangho Kim<sup>‡</sup>, Gary A. Sulikowski<sup>‡</sup>, Carmelo J. Rizzo<sup>§</sup>, Amit Ketkar<sup>¶</sup>, Robert L. Eoff<sup>¶</sup>, Carol A. Rouzer<sup>‡</sup>, and Lawrence J. Marnett<sup>‡,‡,\*</sup>

<sup>†</sup>Department of Chemistry, Vanderbilt University; Vanderbilt Institute of Chemical Biology, Vanderbilt University School of Medicine, Nashville, Tennessee 37232, United States

<sup>‡</sup>A. B. Hancock, Jr., Memorial Laboratory for Cancer Research, Departments of Biochemistry, and Pharmacology, Vanderbilt Institute of Chemical Biology, and Vanderbilt-Ingram Cancer Center, Vanderbilt University School of Medicine, Nashville, Tennessee 37232, United States

<sup>§</sup>Departments of Chemistry and Biochemistry, Vanderbilt-Ingram Cancer Center, Vanderbilt University, Nashville, Tennessee 37235

<sup>¶</sup>Department of Biochemistry and Molecular Biology, University of Arkansas for Medical Sciences, Little Rock, Arkansas 72205, United States

### Table of Contents

| <u>Item</u>                                                                                                                                                                                | <u>Page Number</u> |
|--------------------------------------------------------------------------------------------------------------------------------------------------------------------------------------------|--------------------|
| <b>Figure S1.</b> <sup>1</sup> H NMR (DMSO-d <sub>6</sub> ) of compound <b>9</b> .                                                                                                         | S2                 |
| <b>Figure S2.</b> <sup>13</sup> C NMR (DMSO-d <sub>6</sub> ) of compound <b>9</b> .                                                                                                        | S3                 |
| <b>Figure S3.</b> <sup>1</sup> H NMR (DMSO-d <sub>6</sub> ) of compound <b>11</b> .                                                                                                        | S4                 |
| <b>Figure S4.</b> <sup>1</sup> H- <sup>1</sup> H COSY NMR (DMSO-d <sub>6</sub> ) of compound <b>11</b> .                                                                                   | S5                 |
| <b>Figure S5.</b> <sup>13</sup> C NMR (DMSO-d <sub>6</sub> ) of compound <b>11</b> .                                                                                                       | S6                 |
| <b>Figure S6.</b> <sup>1</sup> H NMR (CD <sub>3</sub> CN) of compound <b>12</b> .                                                                                                          | S7                 |
| <b>Figure S7.</b> <sup>31</sup> P NMR (CD <sub>3</sub> CN) of compound <b>12</b> .                                                                                                         | S8                 |
| <b>Figure S8.</b> <sup>13</sup> C NMR (CD <sub>3</sub> CN) of compound <b>12</b> .                                                                                                         | S9                 |
| <b>Figure S9.</b> HPLC chromatogram and mass spectrum of the 6-oxo-M <sub>1</sub> dG-containing oligonucleotides.                                                                          | S10                |
| <b>Figure S10.</b> <sup>1</sup> H NMR (DMSO-d <sub>6</sub> ) of compound <b>10</b> .                                                                                                       | S11                |
| <b>Figure S11.</b> <sup>1</sup> H- <sup>1</sup> H COSY NMR (DMSO-d <sub>6</sub> ) of compound <b>10</b> .                                                                                  | S12                |
| <b>Figure S12.</b> LC-MS/MS chromatogram, HPLC chromatogram, and UV spectra of individual nucleosides of an enzymatic digestion of the 6-oxo-M <sub>1</sub> dG-containing oligonucleotide. | S13                |
| <b>Figure S13.</b> Single nucleotide incorporation opposite dG (control template) and 6-oxo-M <sub>1</sub> dG.                                                                             | S14                |
| <b>Figure S14.</b> Fragmentation scheme for oligonucleotides from McCluckey at al.                                                                                                         | S15                |
| <b>Figure S15.</b> Michaelis-Menten plots obtained from LC-MS/MS analyses.                                                                                                                 | S16                |
| <b>Table S1.</b> Q1 and Q3 values of the SRM transitions for each oligonucleotide.                                                                                                         | S17                |
| <b>Table S2.</b> Steady state kinetic parameters for insertion of dCTP and dTTP opposite dG and 6-oxo-M <sub>1</sub> dG.                                                                   | S18                |

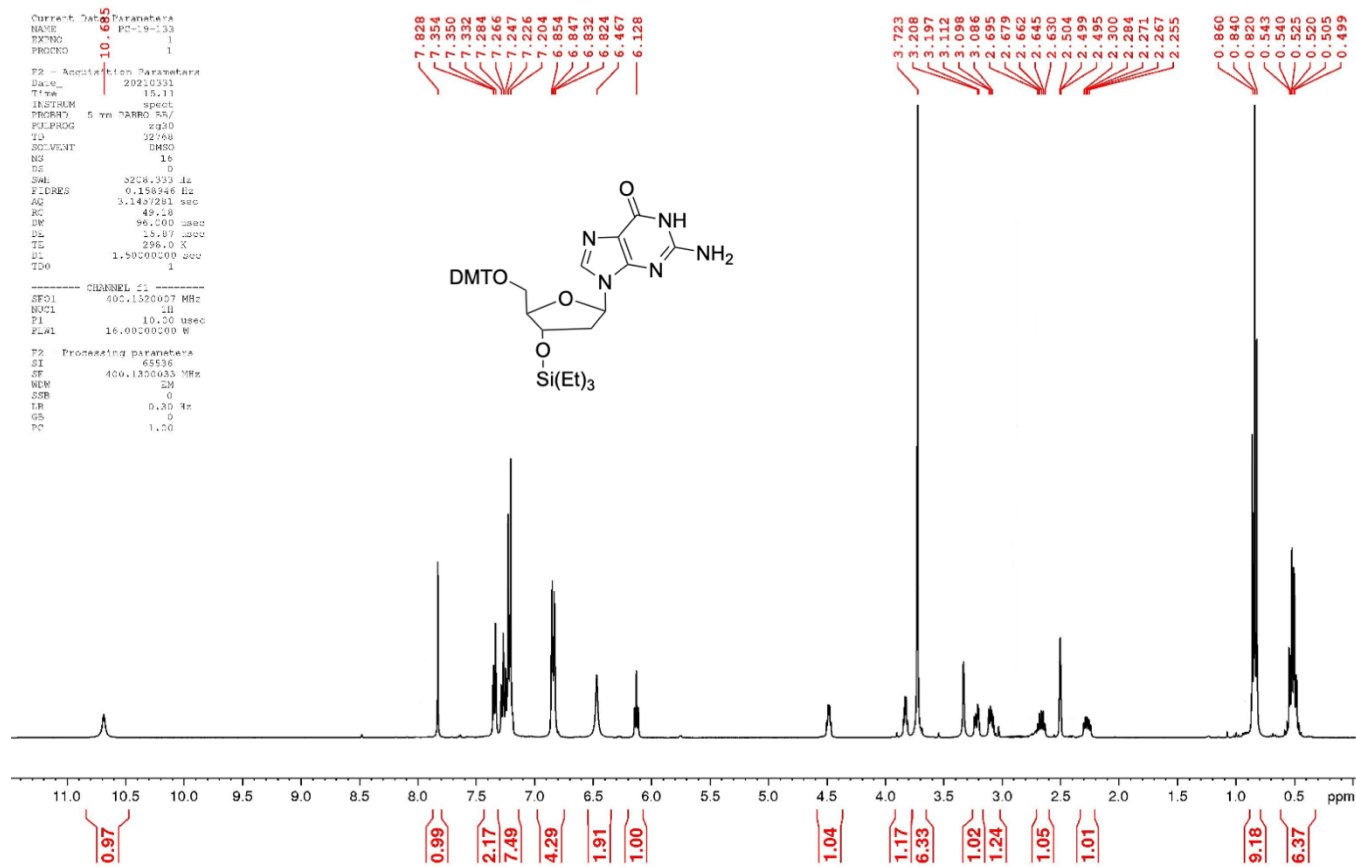

Figure S1. <sup>1</sup>H NMR (DMSO-d<sub>6</sub>) of compound 9.

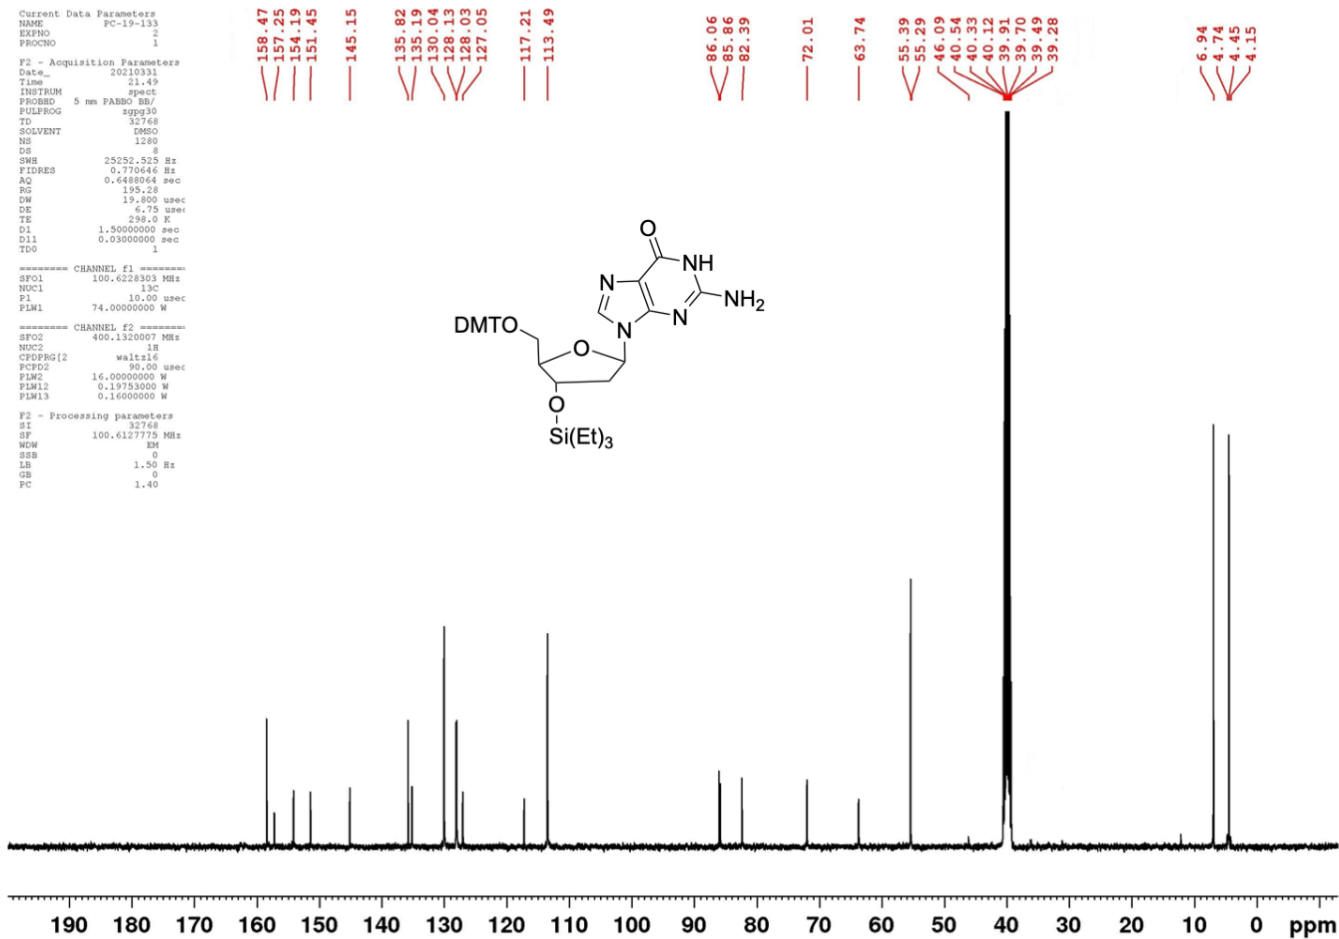

Figure S2. <sup>13</sup>C NMR (DMSO-d<sub>6</sub>) of compound 9.

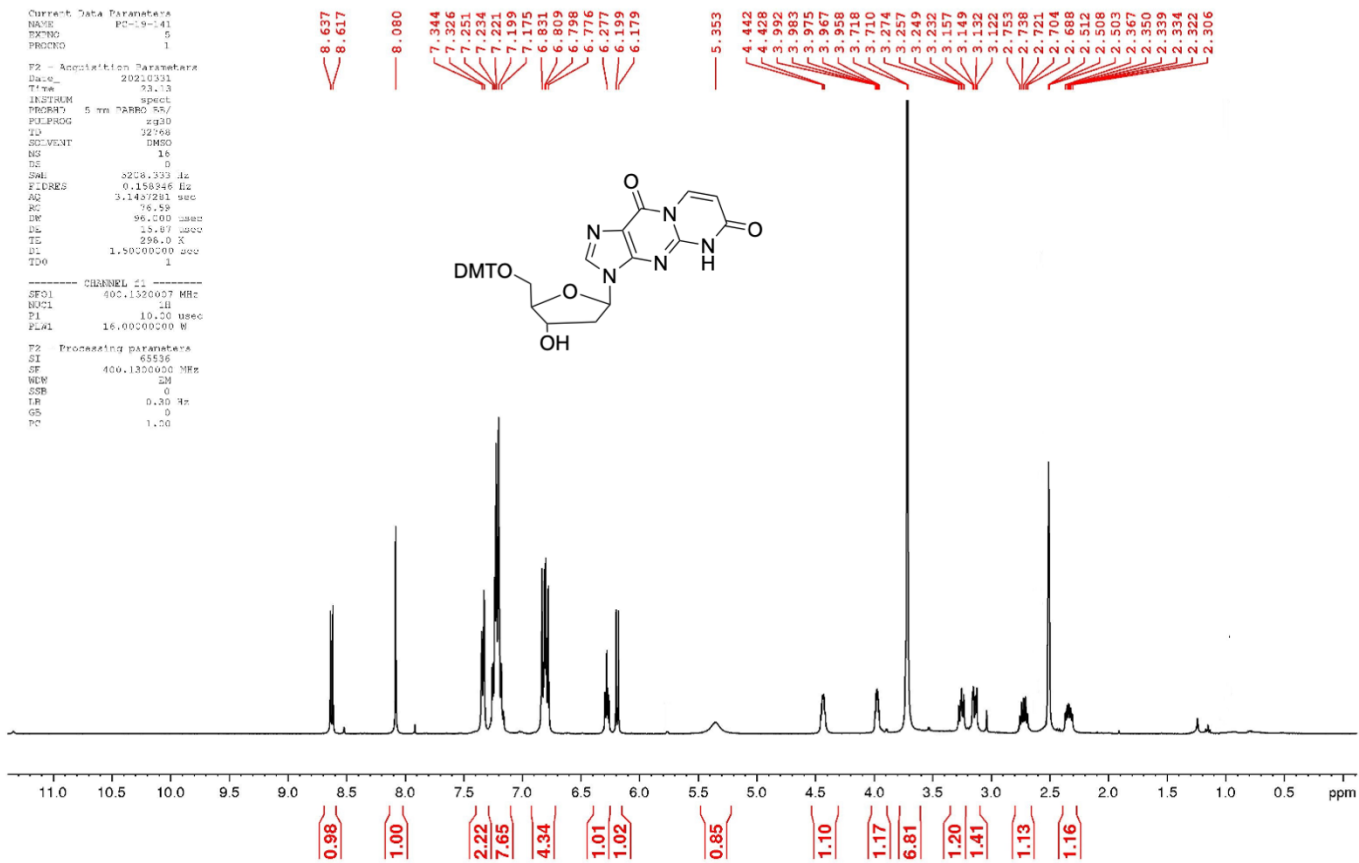

Figure S3. <sup>1</sup>H NMR (DMSO-d<sub>6</sub>) of compound 11.

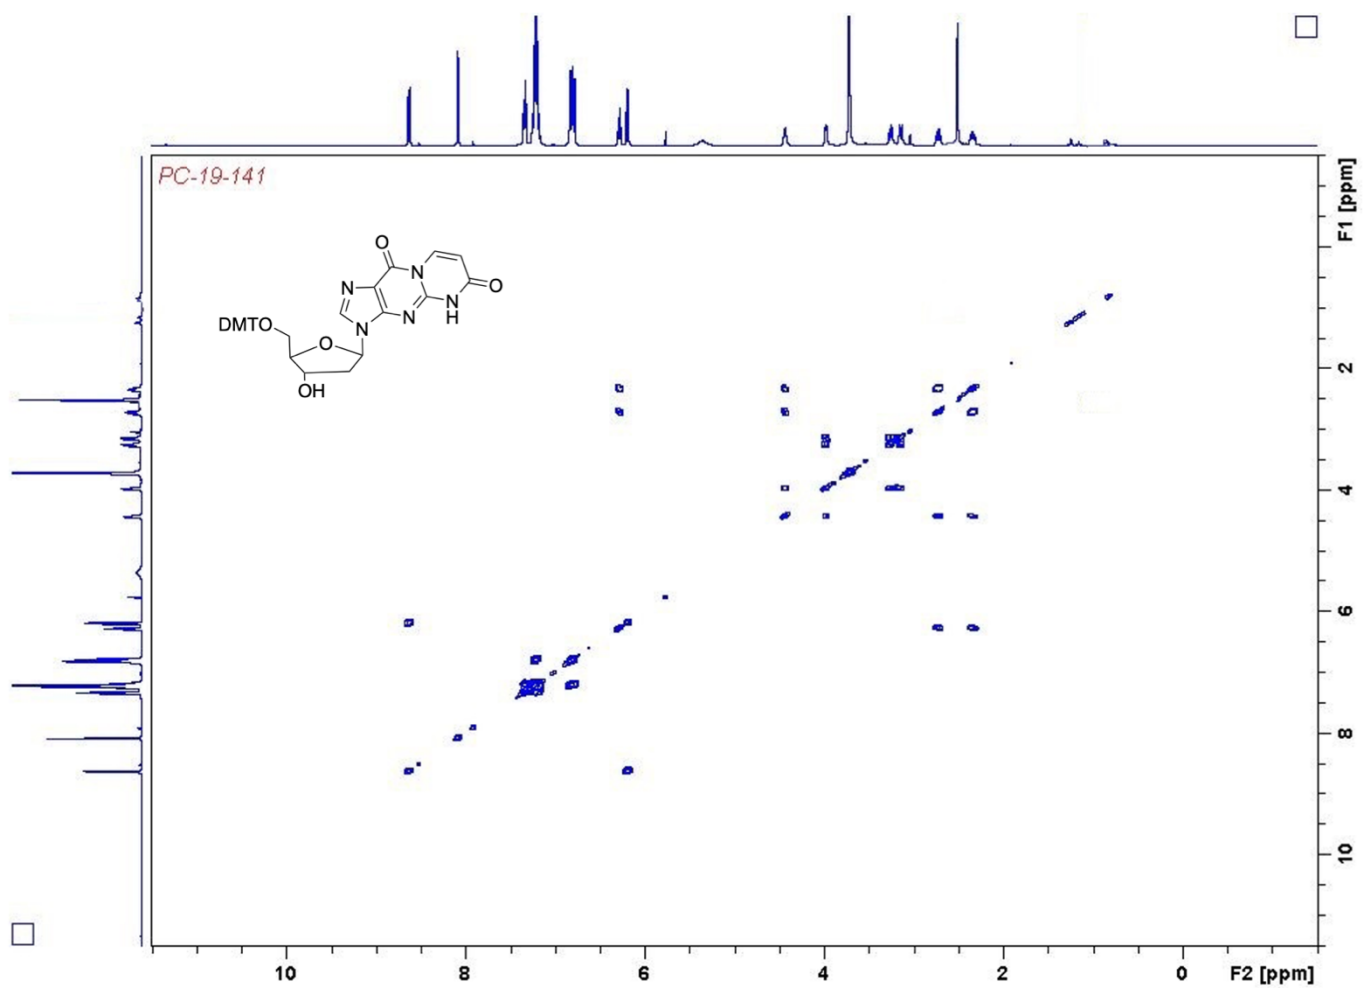

**Figure S4.**  $^1\text{H}$ - $^1\text{H}$  COSY NMR (DMSO- $d_6$ ) of compound **11**.

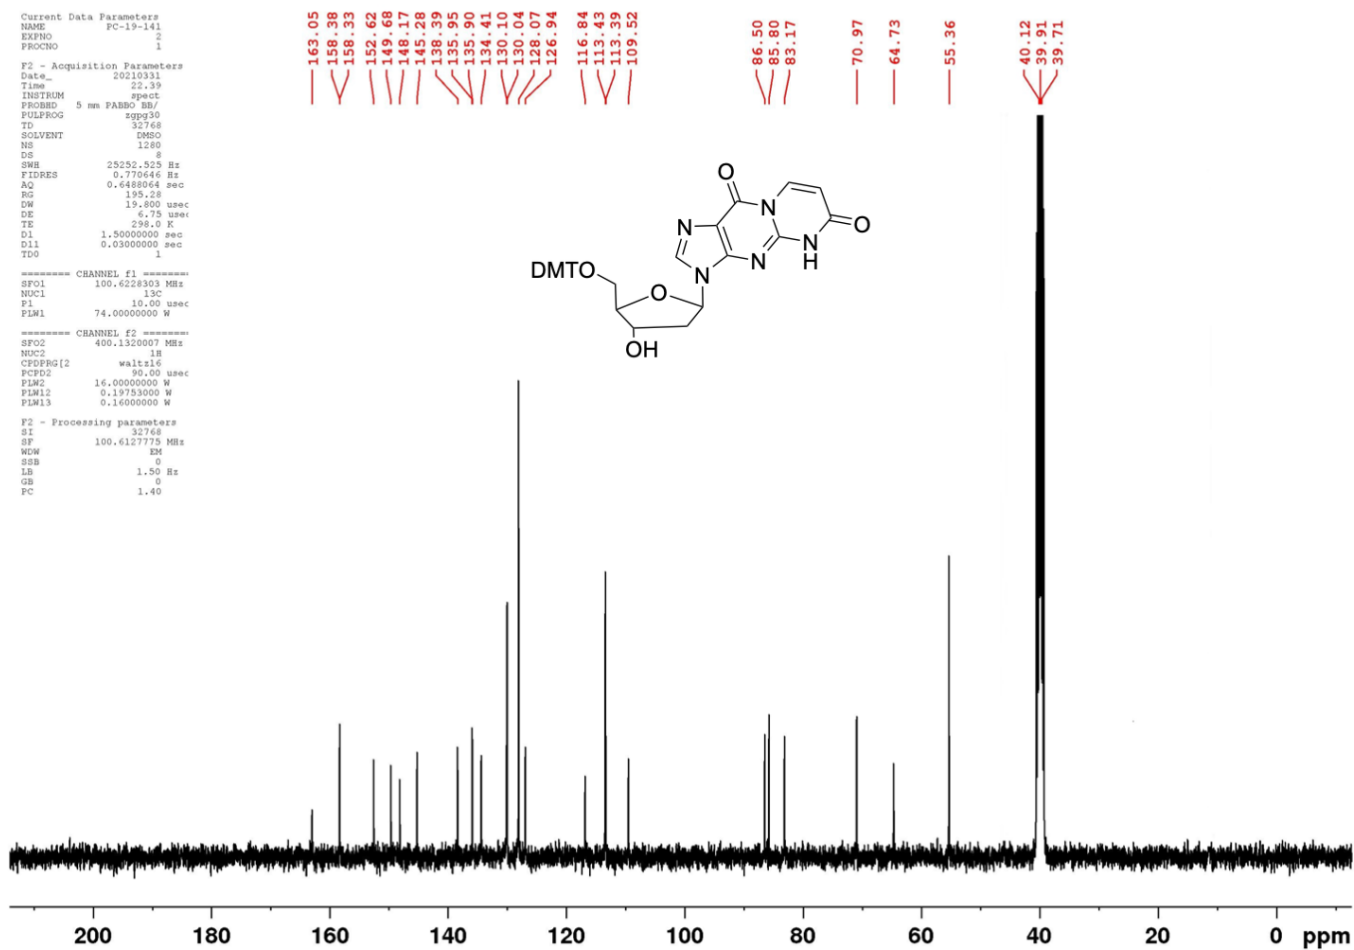

Figure S5.  $^{13}\text{C}$  NMR (DMSO- $d_6$ ) of compound 11.

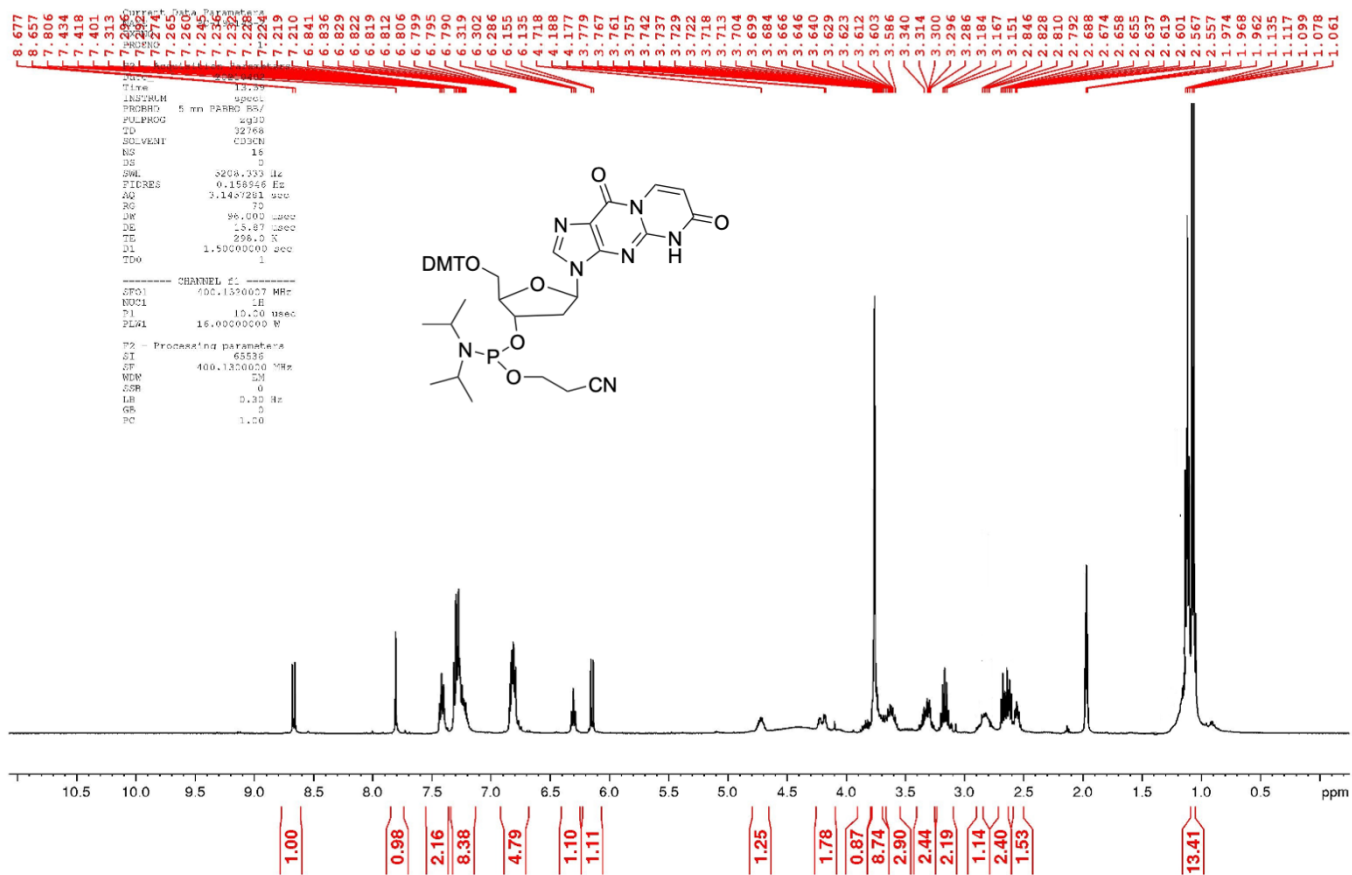

Figure S6. <sup>1</sup>H NMR (CD<sub>3</sub>CN) of compound 12.

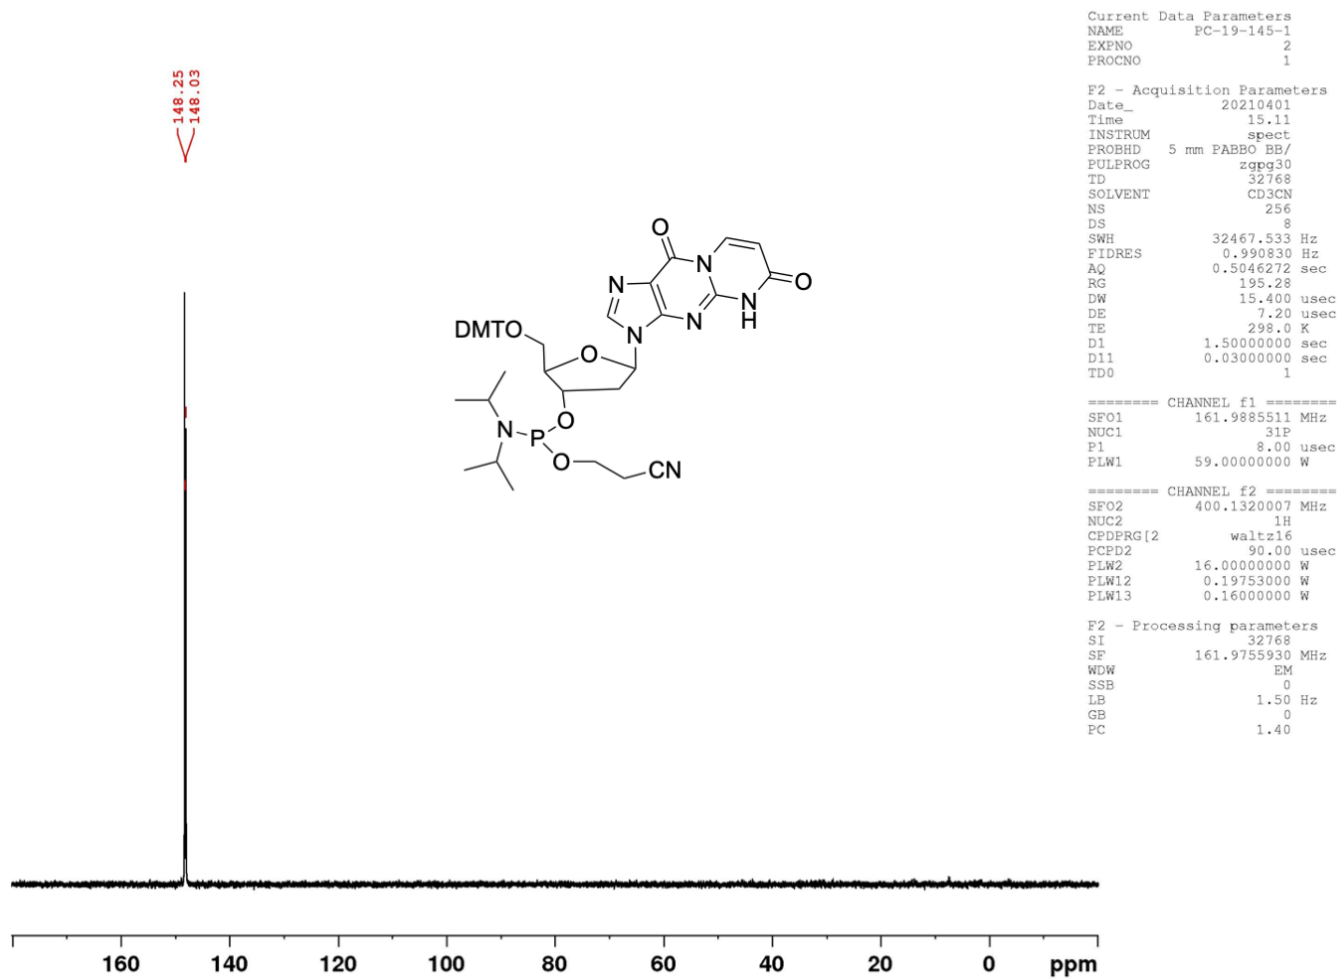

Figure S7.  $^{31}\text{P}$  NMR ( $\text{CD}_3\text{CN}$ ) of compound 12.



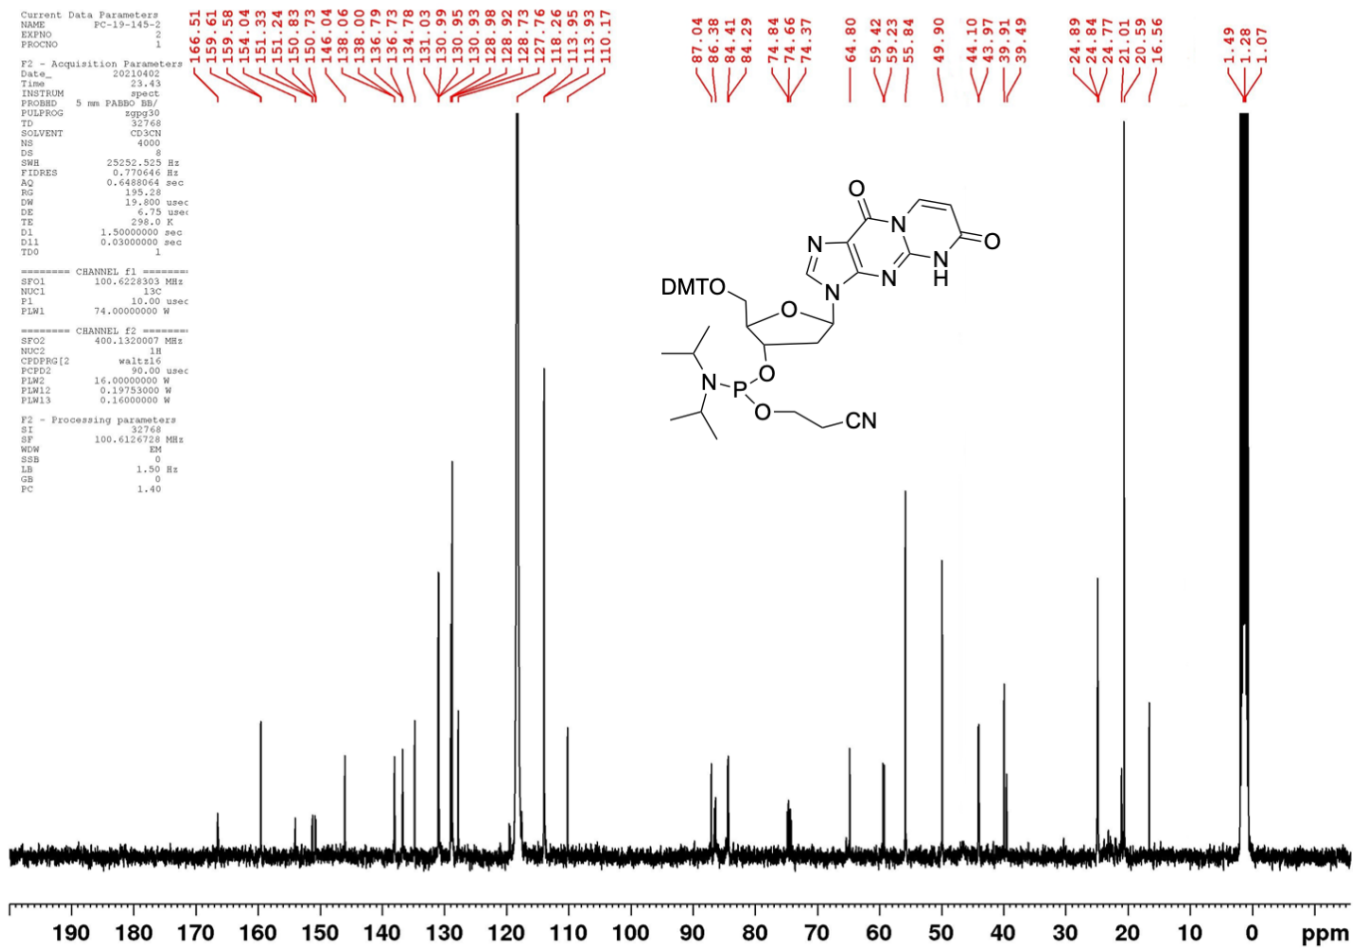

Figure S8. <sup>13</sup>C NMR (CD<sub>3</sub>CN) of compound 12.

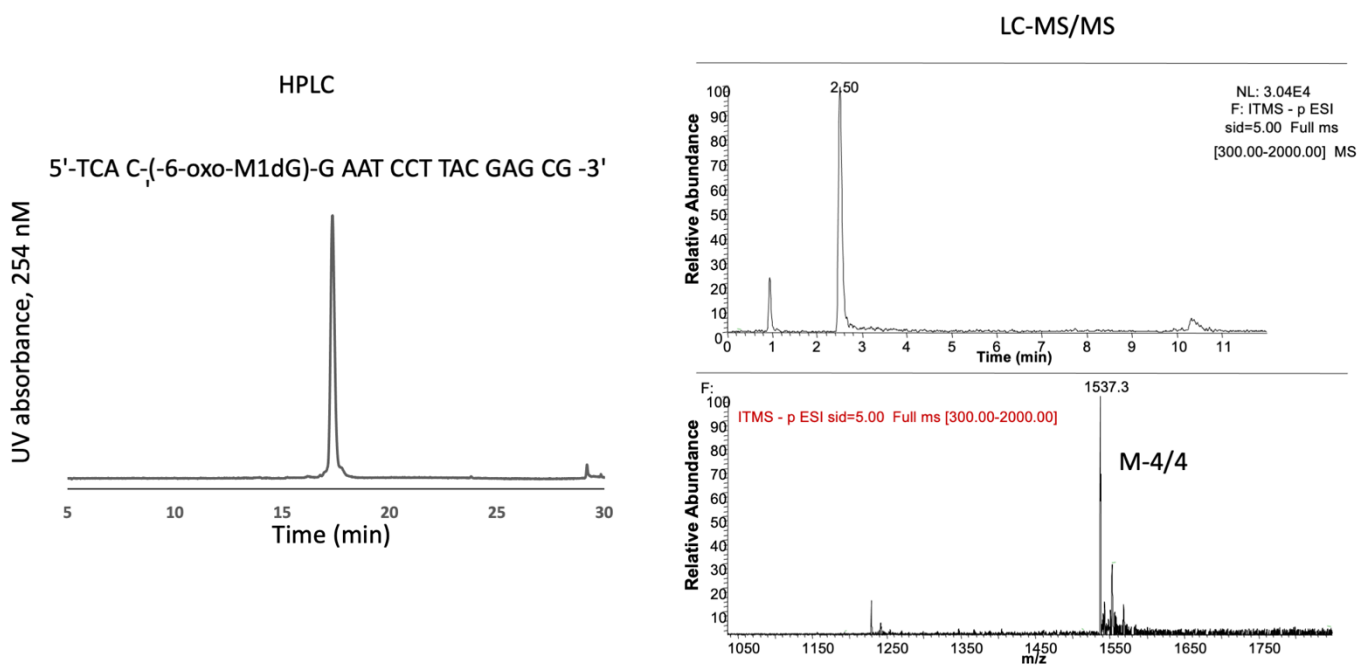

**Figure S9.** HPLC chromatogram and mass spectrum of the 6-oxo-M<sub>1</sub>dG-containing oligonucleotides.

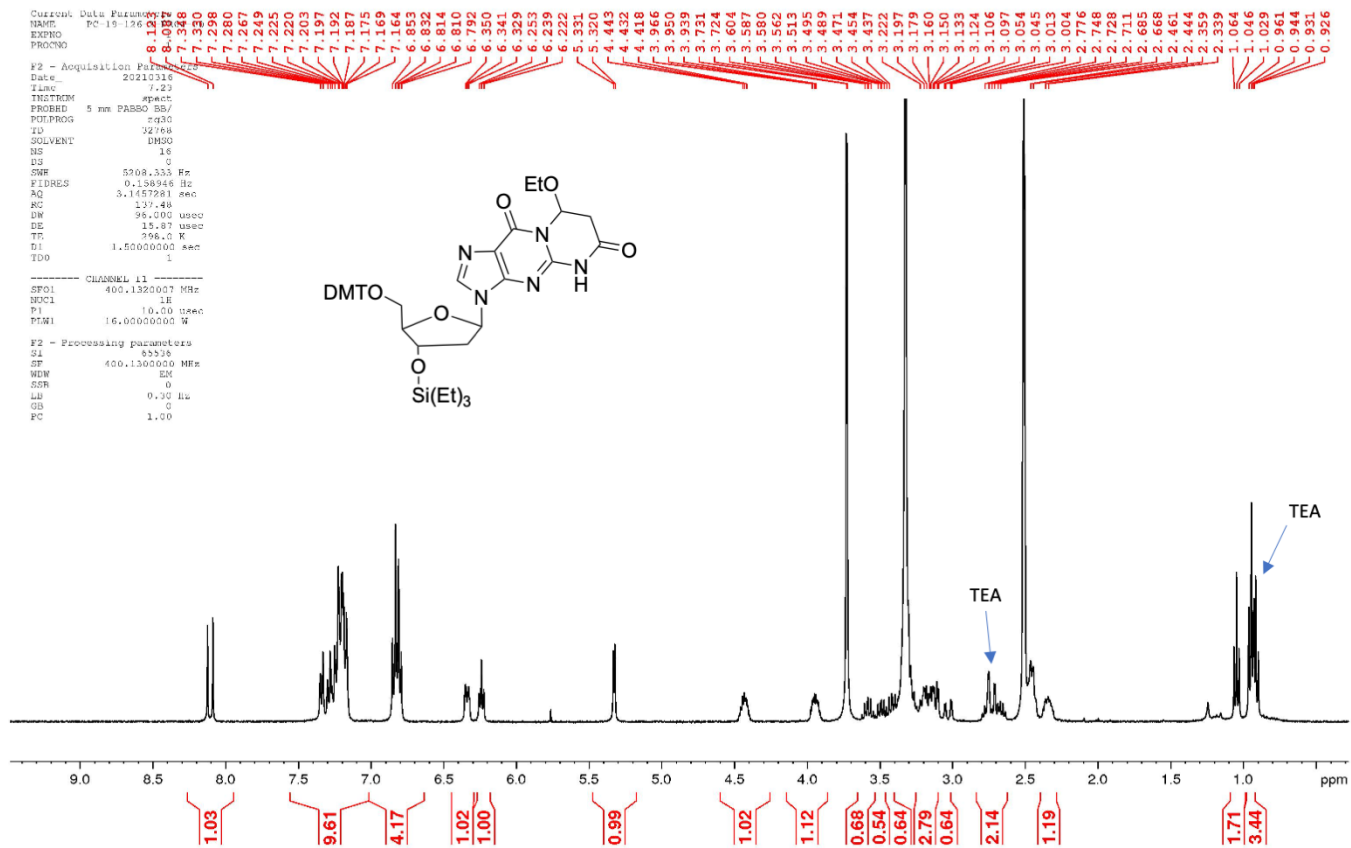

Figure S10. <sup>1</sup>H NMR (DMSO-d<sub>6</sub>) of compound 10.

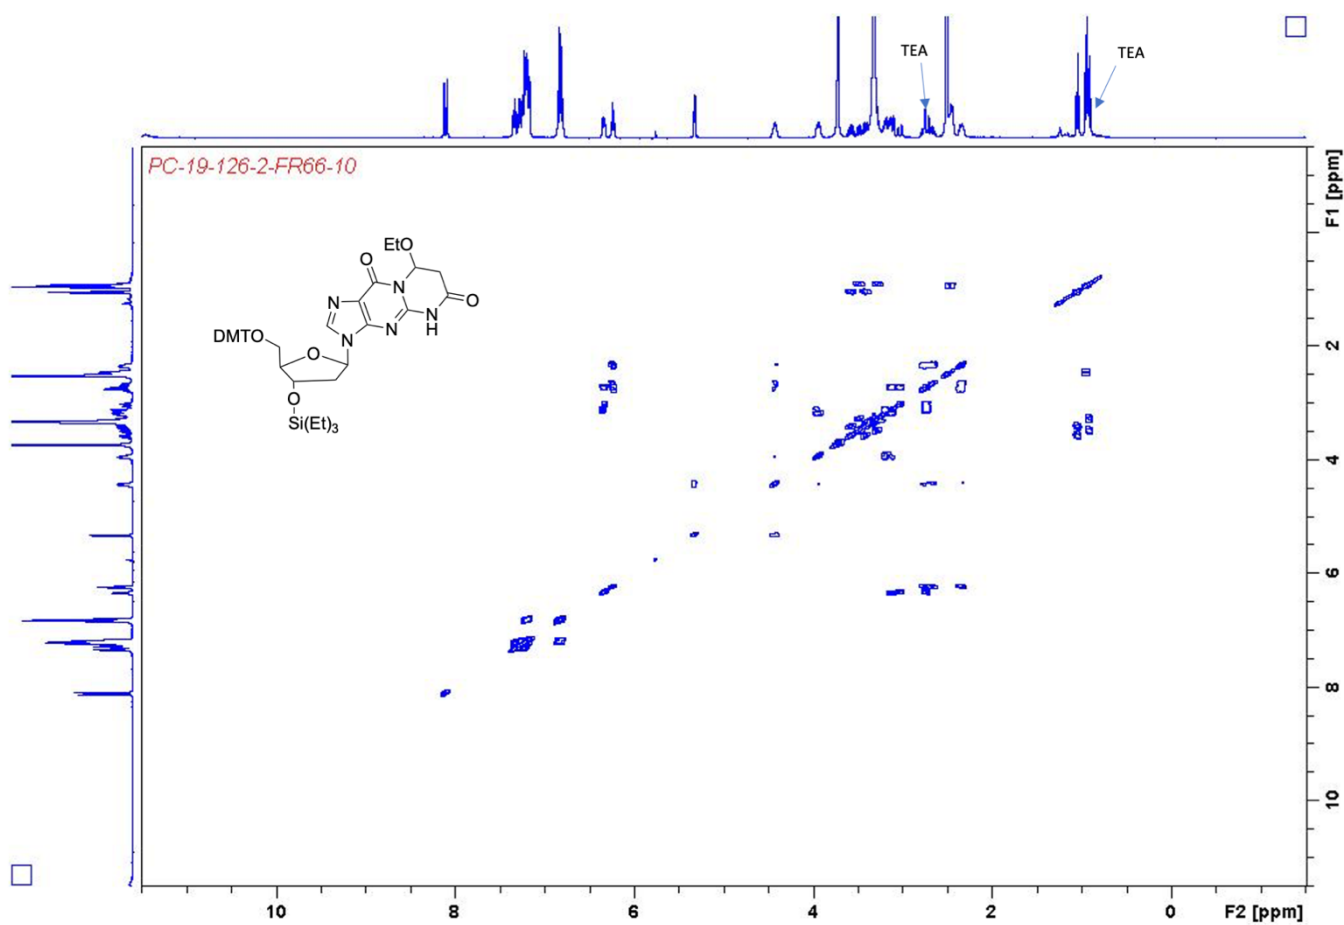

**Figure S11.**  $^1\text{H}$ - $^1\text{H}$  COSY NMR (DMSO- $d_6$ ) of compound **10**.

**A**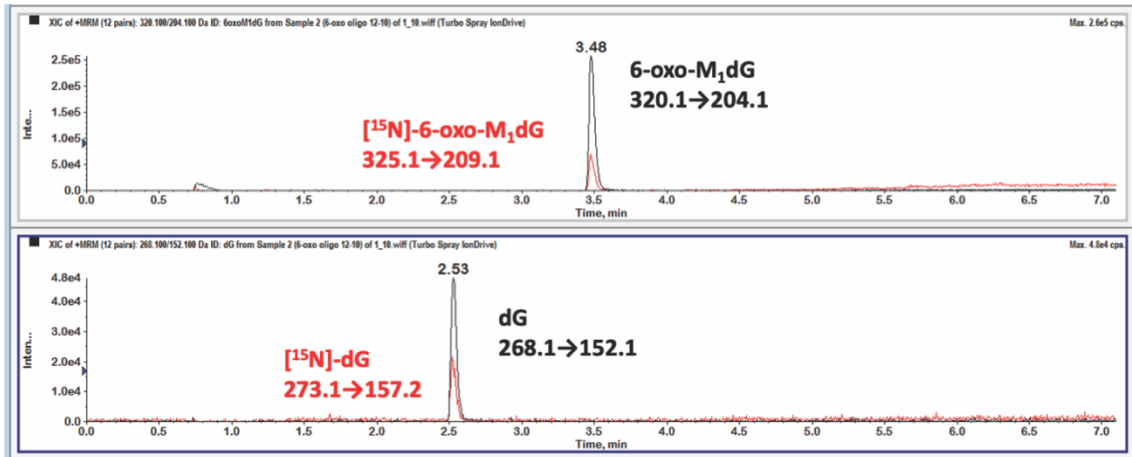**B**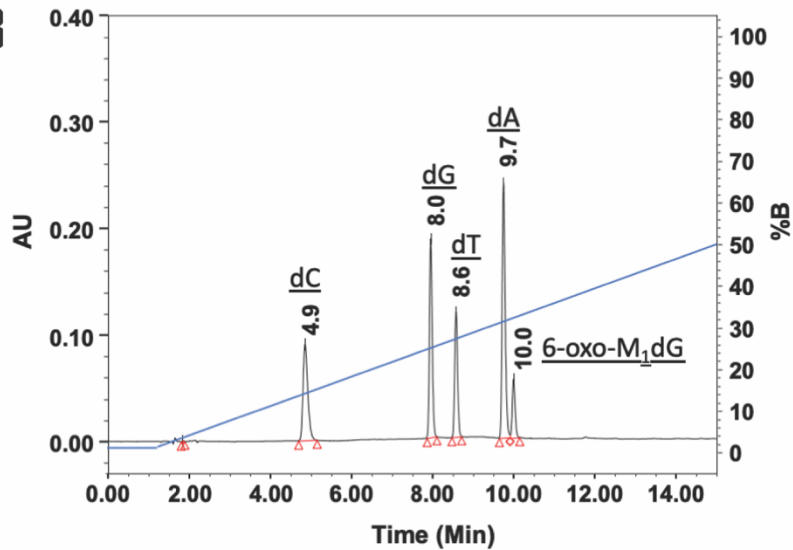**C**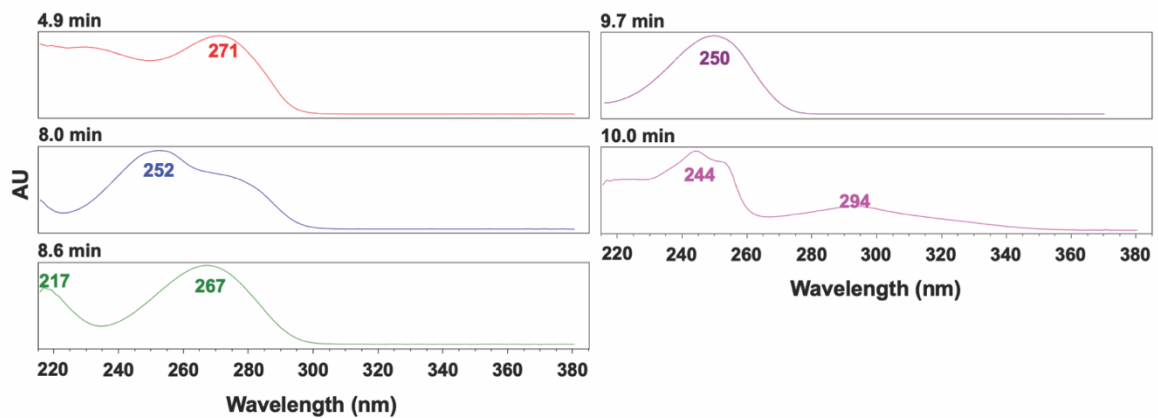

**Figure S12.** LC-MS/MS chromatogram (A), HPLC chromatogram (B), and UV spectra of individual nucleosides (C) of an enzymatic digestion of the 6-oxo-M<sub>1</sub>dG-containing oligonucleotide: dC (4.9 min), dG (8.0 min), dT (8.6 min), dA (9.7 min), 6-oxo-M<sub>1</sub>dG (10.0 min).

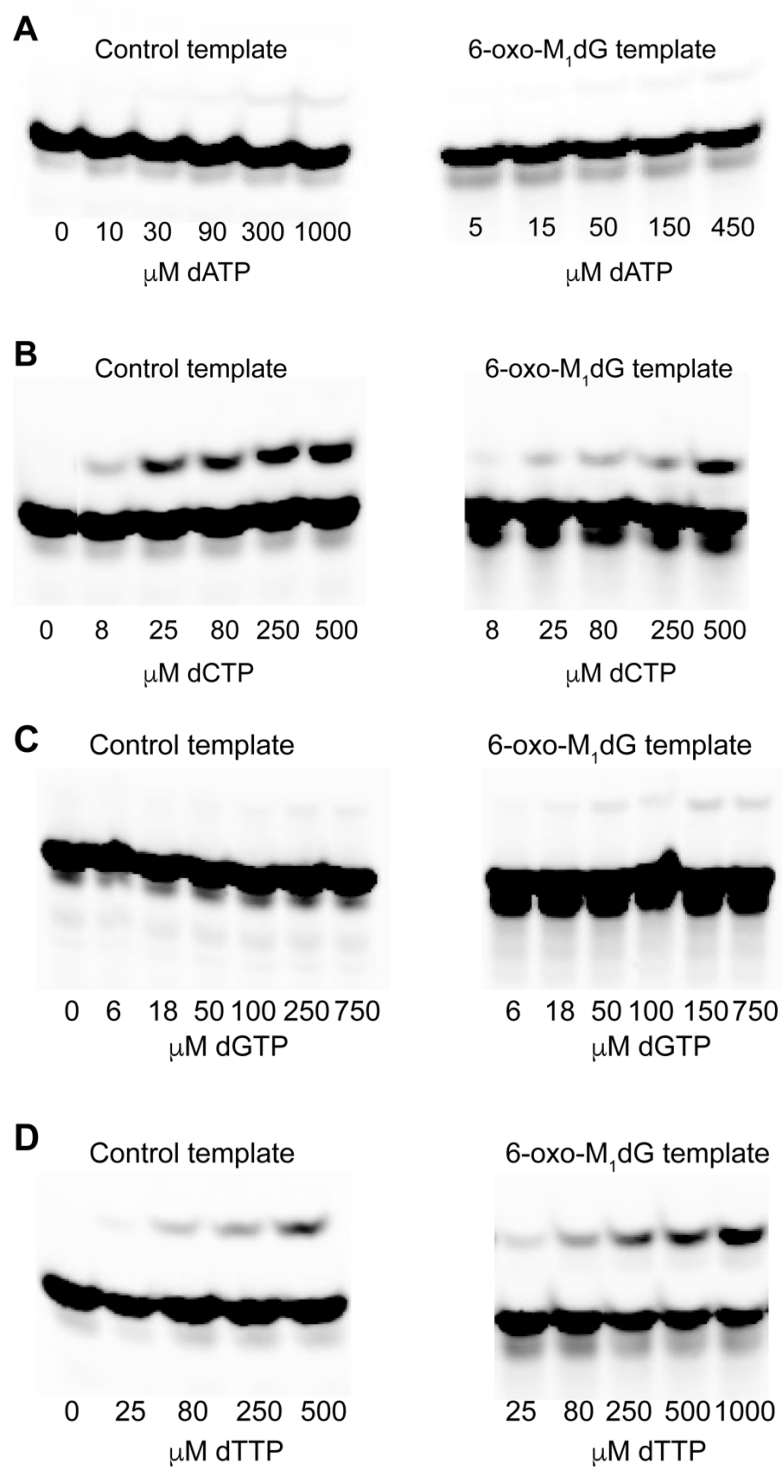

**Figure S13.** Single nucleotide incorporation opposite dG (control template) and 6-oxo-M<sub>1</sub>dG. hPol  $\epsilon$  (65 nM for control duplex or 82 nM for 6-oxo-M<sub>1</sub>dG duplex) was incubated with 5  $\mu$ M DNA duplex and increasing concentrations of nucleotides. The reaction was stopped at 6 min for the control duplex and 11 min for the 6-oxo-M<sub>1</sub>dG duplex. (A) Incorporation of dATP. (B) Incorporation of dCTP. (C) Incorporation of dGTP. (D) Incorporation of dTTP.

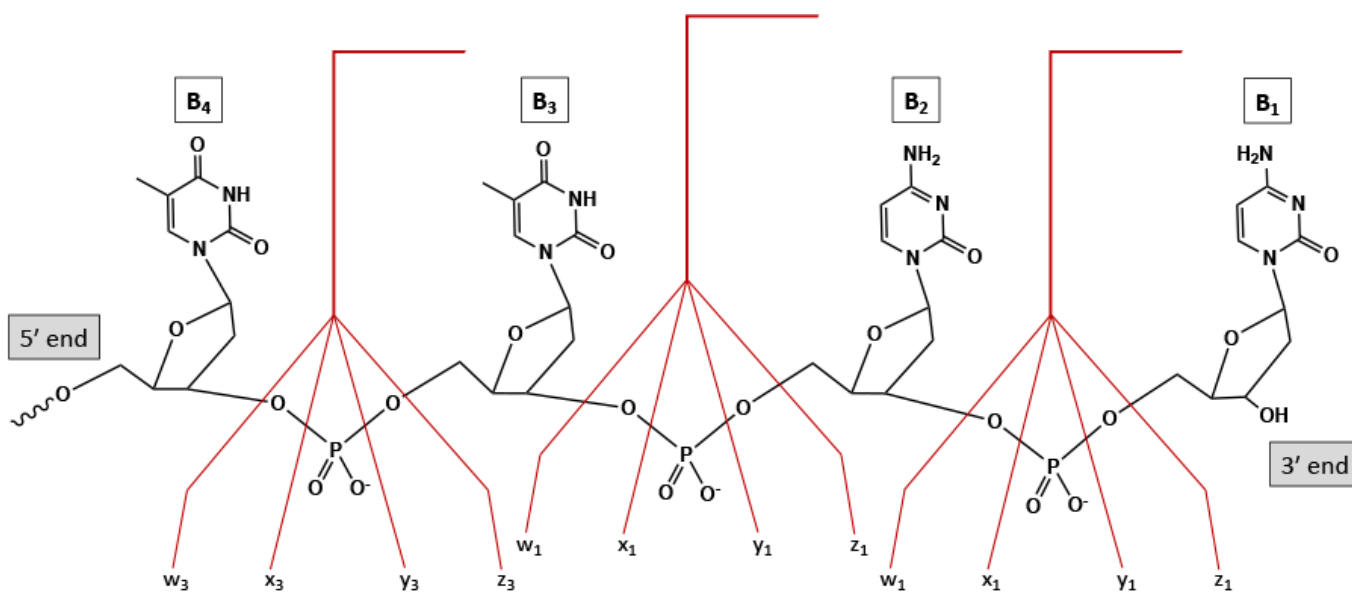

**Figure S14.** Fragmentation scheme for oligonucleotides from McCluckey et al. (1). Only the fragments containing the 3' end are shown. The w- and y- ions were widely observed in our mass spectrometry system. Also, multiple charge states of larger fragments (bases 3 and up) were often seen.

#### Reference

1. McCluckey, S.A., Van Berkel, G.J. and Glish, G.L. (1992) Tandem mass spectrometry of small, multiply charged oligonucleotides. *J Am Soc Mass Spectrom*, **3**, 60-70.

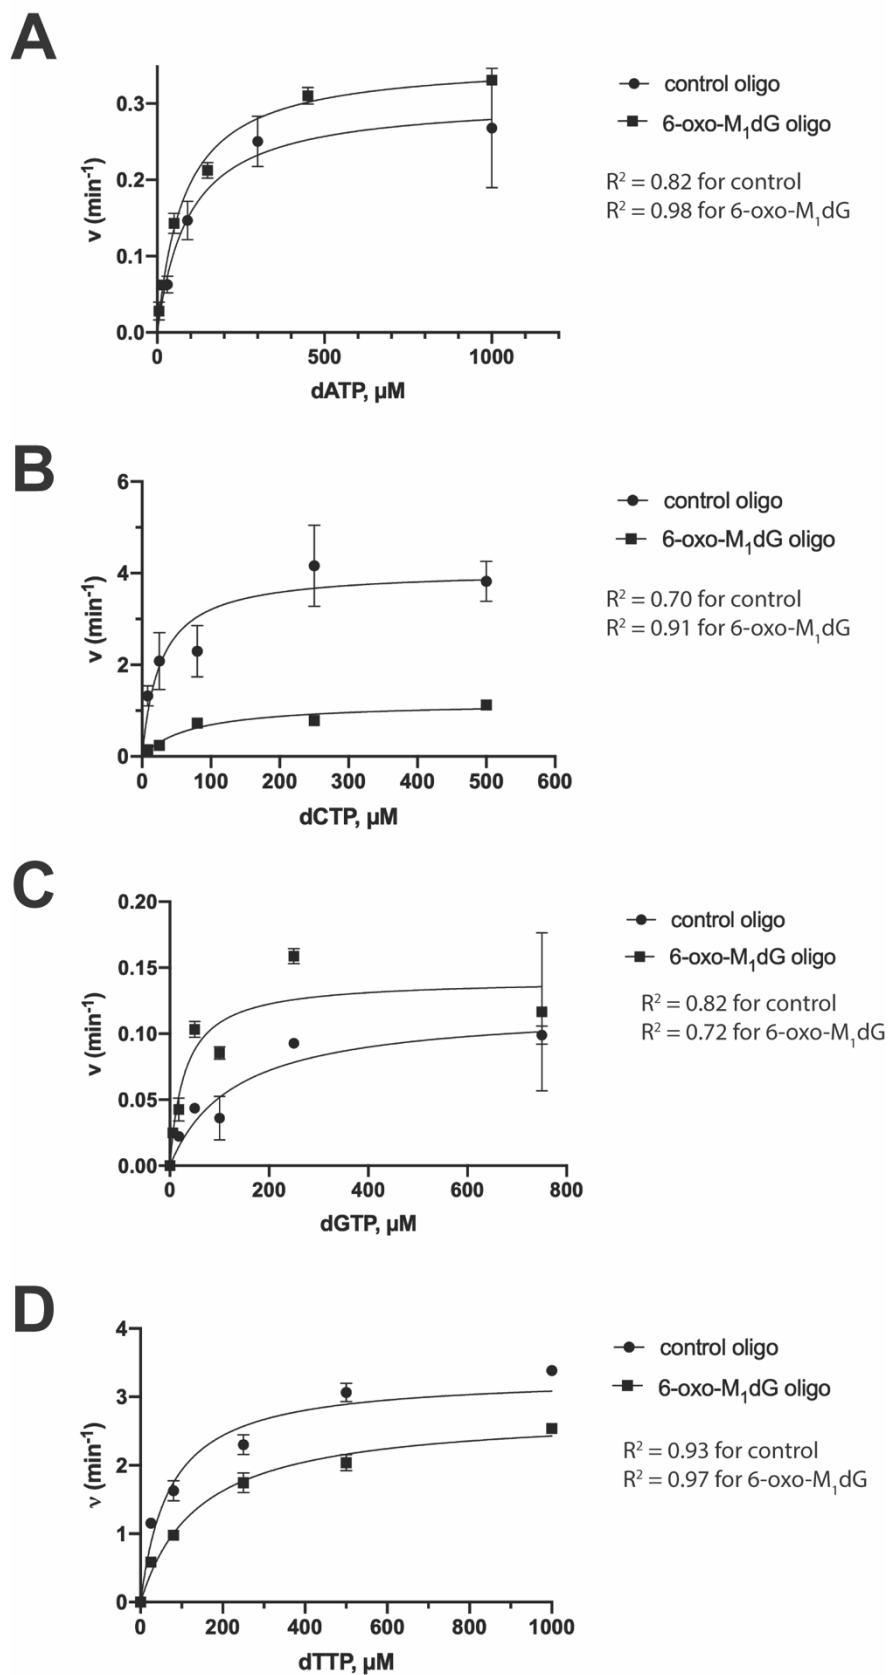

**Figure S15.** Michaelis-Menten plots obtained from the LC-MS/MS analysis of samples generated during the experiments described in the legend to Figure S13.



**Table S1.** Q1 and Q3 values of the SRM transitions for each oligonucleotide. Sequences of the oligonucleotides are provided in Supplementary Table 2.

| Oligo       | Q1    | z | Q3    | frag  | z |
|-------------|-------|---|-------|-------|---|
| FAM         | 637.0 | 8 | 306.1 | w-1   | 1 |
|             |       |   | 834.2 | y-3   | 1 |
| FAM+1 (16C) | 673.1 | 8 | 306.1 | w-1   | 1 |
|             |       |   | 614.1 | w-6   | 1 |
| 16T         | 675.1 | 8 | 321.1 | w-1   | 1 |
|             |       |   | 702.4 | y-7   | 3 |
| 16A         | 600.9 | 9 | 586.1 | Depur | 9 |
|             |       |   | 705.5 | y-7   | 3 |
| 16G         | 678.1 | 8 | 661.5 | Depur | 8 |
|             |       |   | 635.1 | w-2   | 1 |
| FAM+2       | 714.1 | 8 | 510.2 | w-5   | 3 |
|             |       |   | 765.6 | w-5   | 2 |
| FAM+3       | 752.1 | 8 | 650.2 | w-2   | 1 |
|             |       |   | 735.6 | Depur | 8 |
| 19C         | 705.2 | 9 | 346.1 | w-1   | 1 |
|             |       |   | 650.1 | w-2   | 1 |
| Control     | 761.8 | 8 | 631.1 | w-6   | 3 |
|             |       |   | 762.6 | y-5   | 2 |

**Table S2.** Steady state kinetic parameters for insertion of dCTP and dTTP opposite dG and 6-oxo-M<sub>1</sub>dG by human Pol  $\epsilon$  as obtained from analyzing bands on denaturing SDS gel. For comparison, data are provided for an M<sub>1</sub>dG template from reference 19.

| Nucleotide                       | $k_{cat}$ (min <sup>-1</sup> ) | $K_m$ ( $\mu$ M) | $k_{cat}/K_m$ ( $\mu$ M <sup>-1</sup> min <sup>-1</sup> ) |
|----------------------------------|--------------------------------|------------------|-----------------------------------------------------------|
| dCTP                             | 4.1 $\pm$ 0.2                  | 14 $\pm$ 4       | 0.29                                                      |
| dTTP                             | 3.3 $\pm$ 0.2                  | 71 $\pm$ 15      | 0.046                                                     |
| Control template                 |                                |                  |                                                           |
| Nucleotide                       | $k_{cat}$ (min <sup>-1</sup> ) | $K_m$ ( $\mu$ M) | $k_{cat}/K_m$ ( $\mu$ M <sup>-1</sup> min <sup>-1</sup> ) |
| dCTP                             | 1.4 $\pm$ 0.1                  | 33 $\pm$ 9       | 0.043                                                     |
| dTTP                             | 2.8 $\pm$ 0.1                  | 140 $\pm$ 20     | 0.020                                                     |
| 6-oxo-M <sub>1</sub> dG template |                                |                  |                                                           |
| Nucleotide                       | $k_{cat}$ (min <sup>-1</sup> ) | $K_m$ ( $\mu$ M) | $k_{cat}/K_m$ ( $\mu$ M <sup>-1</sup> min <sup>-1</sup> ) |
| dCTP                             | 0.34 $\pm$ 0.003               | 2.4 $\pm$ 1.0    | 0.014                                                     |
| dTTP                             | 0.028 $\pm$ 0.003              | 24 $\pm$ 14      | 0.001                                                     |
| M <sub>1</sub> dG template       |                                |                  |                                                           |
